# Supplementary material for: Ultra-Sensitive and Fast Humidity Sensors Based on Direct Laser-Scribed Graphene Oxide/Carbon Nanotubes Composites
Source: MDPI journal article supplement (doi:10.3390/nano13091473), 2023-04-26
Supplement: s1 [file s1]

# Ultra-Sensitive and Fast Humidity Sensors Based on Direct Laser-Scribed Graphene Oxide/Carbon Nanotubes Composites

Ammar Al-Hamry <sup>1,\*</sup>, Tianqi Lu <sup>1</sup>, Haoran Chen <sup>1</sup>, Anurag Adiraju <sup>1</sup>, Salem Nasraoui <sup>1</sup>, Amina Brahem <sup>1</sup>, Danica Bajuk-Bogdanović <sup>2</sup>, Saddam Weheabby <sup>1</sup>, Igor A. Pašti <sup>2</sup> and Olfa Kanoun <sup>1,\*</sup>

<sup>1</sup> Measurement and Sensor Technology, Department of Electrical Engineering and Information Technology, Chemnitz University of Technology, 09107 Chemnitz, Germany; tianqi.lu@etit.tu-chemnitz.de (T.L.); adiraju.anurag@etit.tu-chemnitz.de (A.A.); salem.nasraoui@etit.tu-chemnitz.de (S.N.); amina.brahem@etit.tu-chemnitz.de (A.B.); saddam.weheabby@etit.tu-chemnitz.de (S.W.)

<sup>2</sup> University of Belgrade—Faculty of Physical Chemistry, Studentski trg 12–16, 11158 Belgrade, Serbia; danabb@ffh.bg.ac.rs (D.B.-B.); igor@ffh.bg.ac.rs (I.A.P.)

\* Correspondence: ammar.al-hamry@etit.tu-chemnitz.de (A.A.-H.); olfa.kanoun@etit.tu-chemnitz.de (O.K.)

Figure S1 shows the detail of the IDE based sensors, S1-S4, which have a whole geometry of  $10.5 \times 12.2$  mm. The differences are in the gap between fingers, 300, 400, 500 and 600  $\mu\text{m}$  and the number of fingers, 7, 9, 11 and 14, respectively. Laser writing was done 6 times for all the structures. For all sensor the finger width was digitally 600  $\mu\text{m}$  and after laser writing it results in  $425.37 \pm 22.95$   $\mu\text{m}$ . In Table S1, a comparison of gap width before and after laser writing for sensors S1-S4.

**Table S1** IDE sensor dimension specification.

| Sensor No. | Number of fingers | Gap width ( $\mu\text{m}$ ) |                     |
|------------|-------------------|-----------------------------|---------------------|
|            |                   | Digital design              | After laser writing |
| S1         | 7                 | 600                         | $442.21 \pm 26.66$  |
| S2         | 9                 | 500                         | $389.45 \pm 27.42$  |
| S3         | 11                | 400                         | $238.61 \pm 2.91$   |
| S4         | 14                | 300                         | $179.04 \pm 19.67$  |

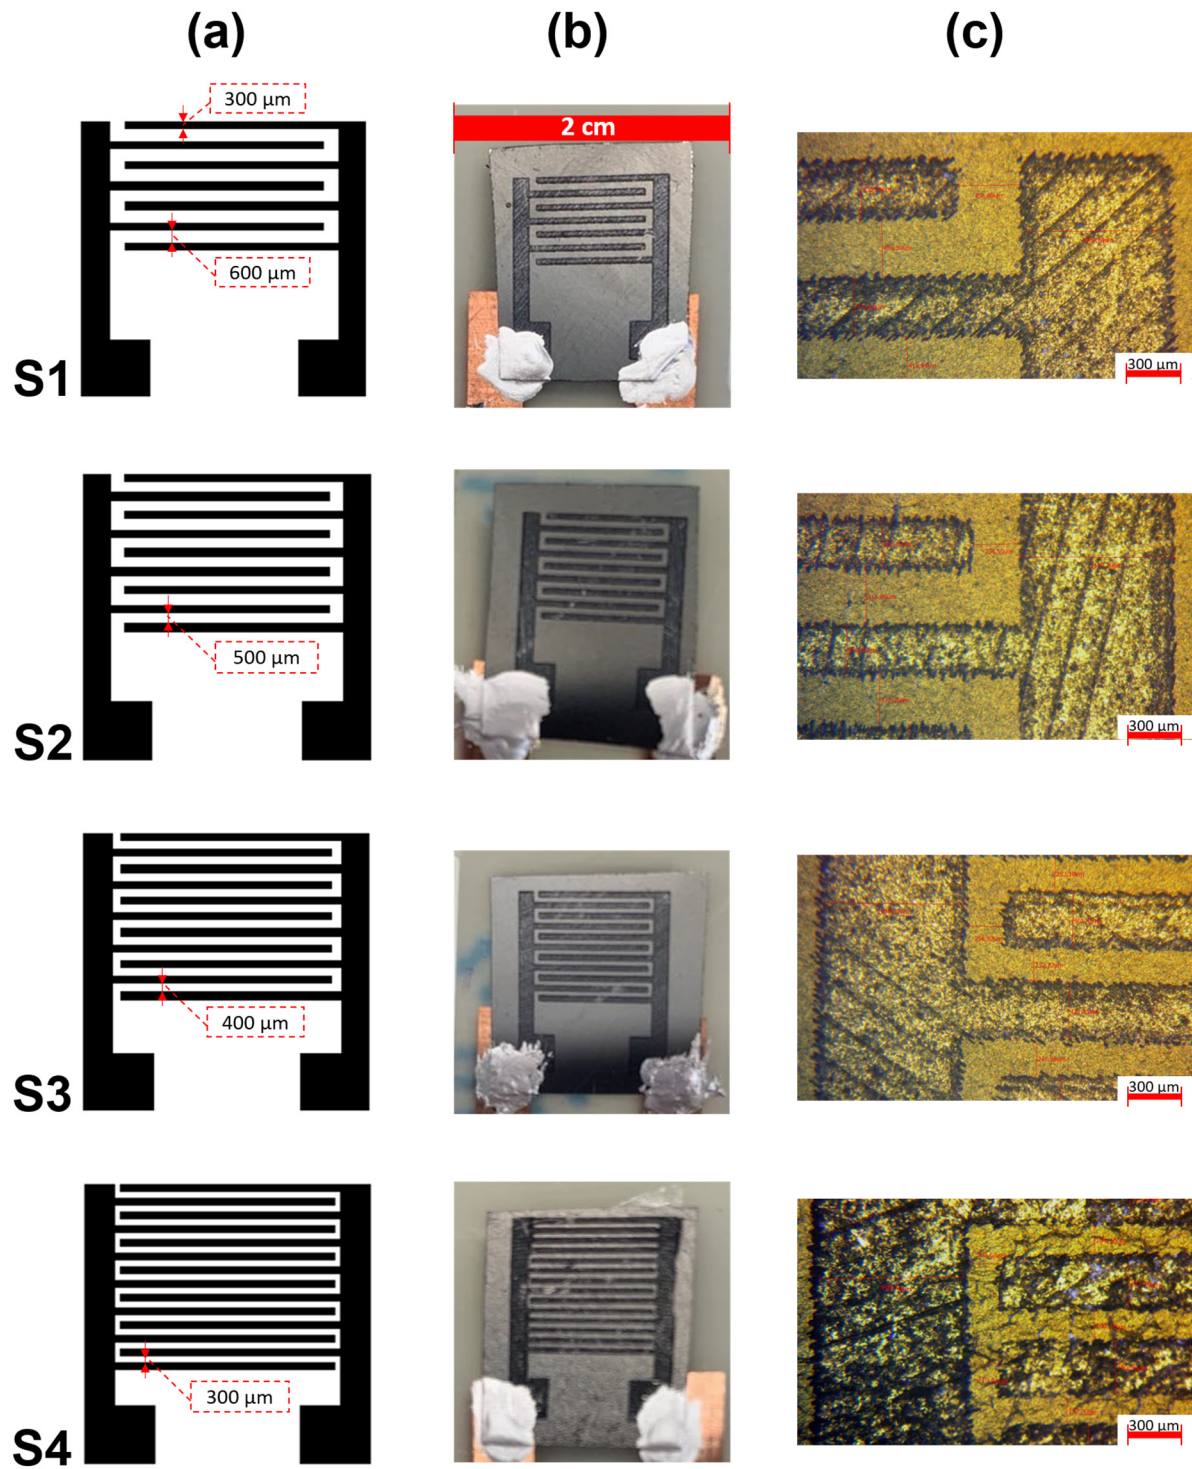

**Figure S1** GO IDE sensors with different fingers gaps: (a) digital design (10.5 × 12.2 mm), (b) camera image of the sensor and (c) optical microscope image of the IDE structure.

## Supplemetry Information

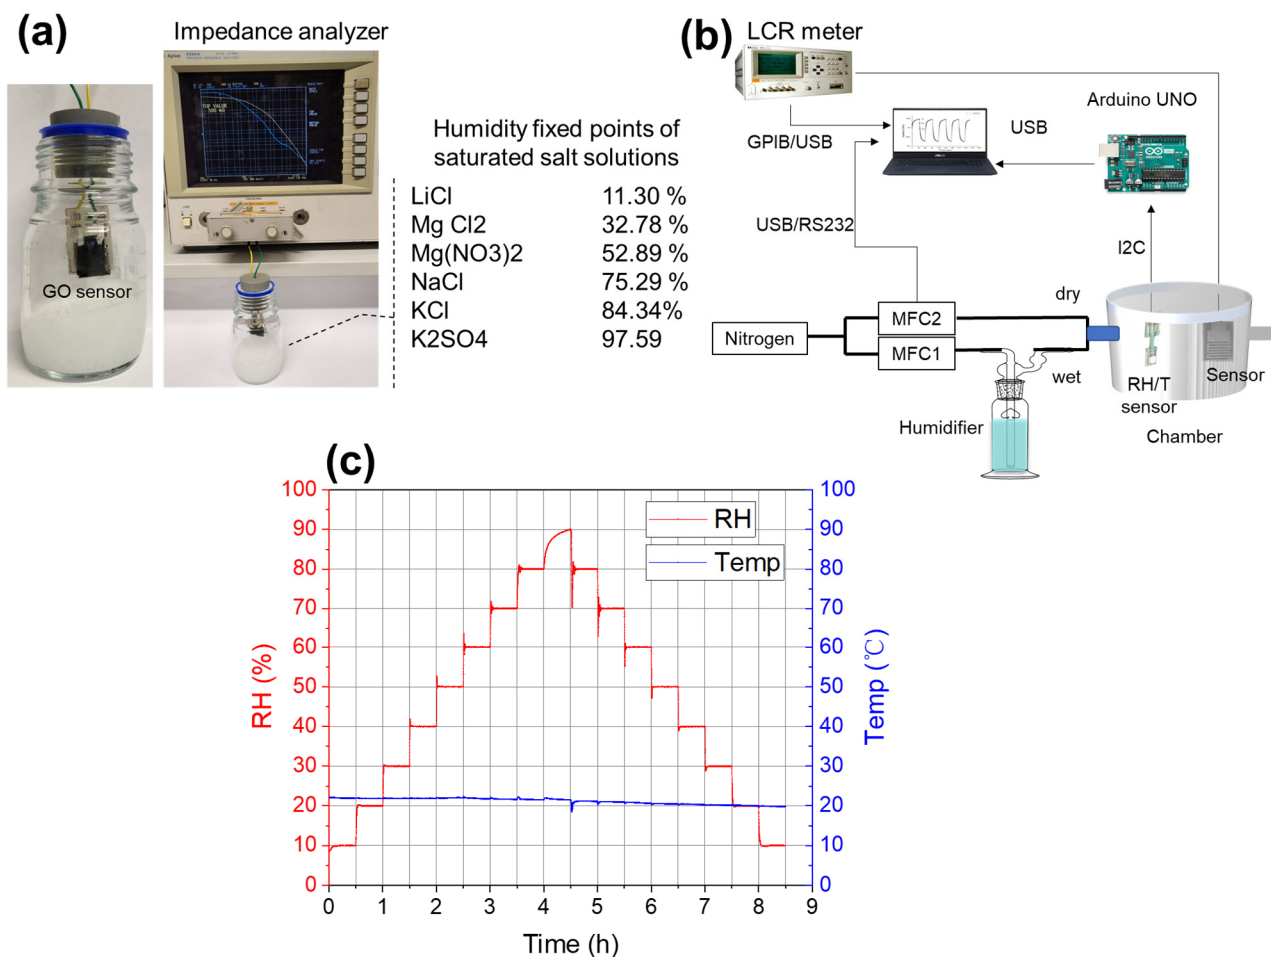

**Figure S2** (a) Photograph of the humidity measurement procedure (using saturated salts and impedance analyzer) (b) two gas flow humidity measurement setup and (c) humidity and temperature measurements inside the chamber in (b).



## Supplemetry Information

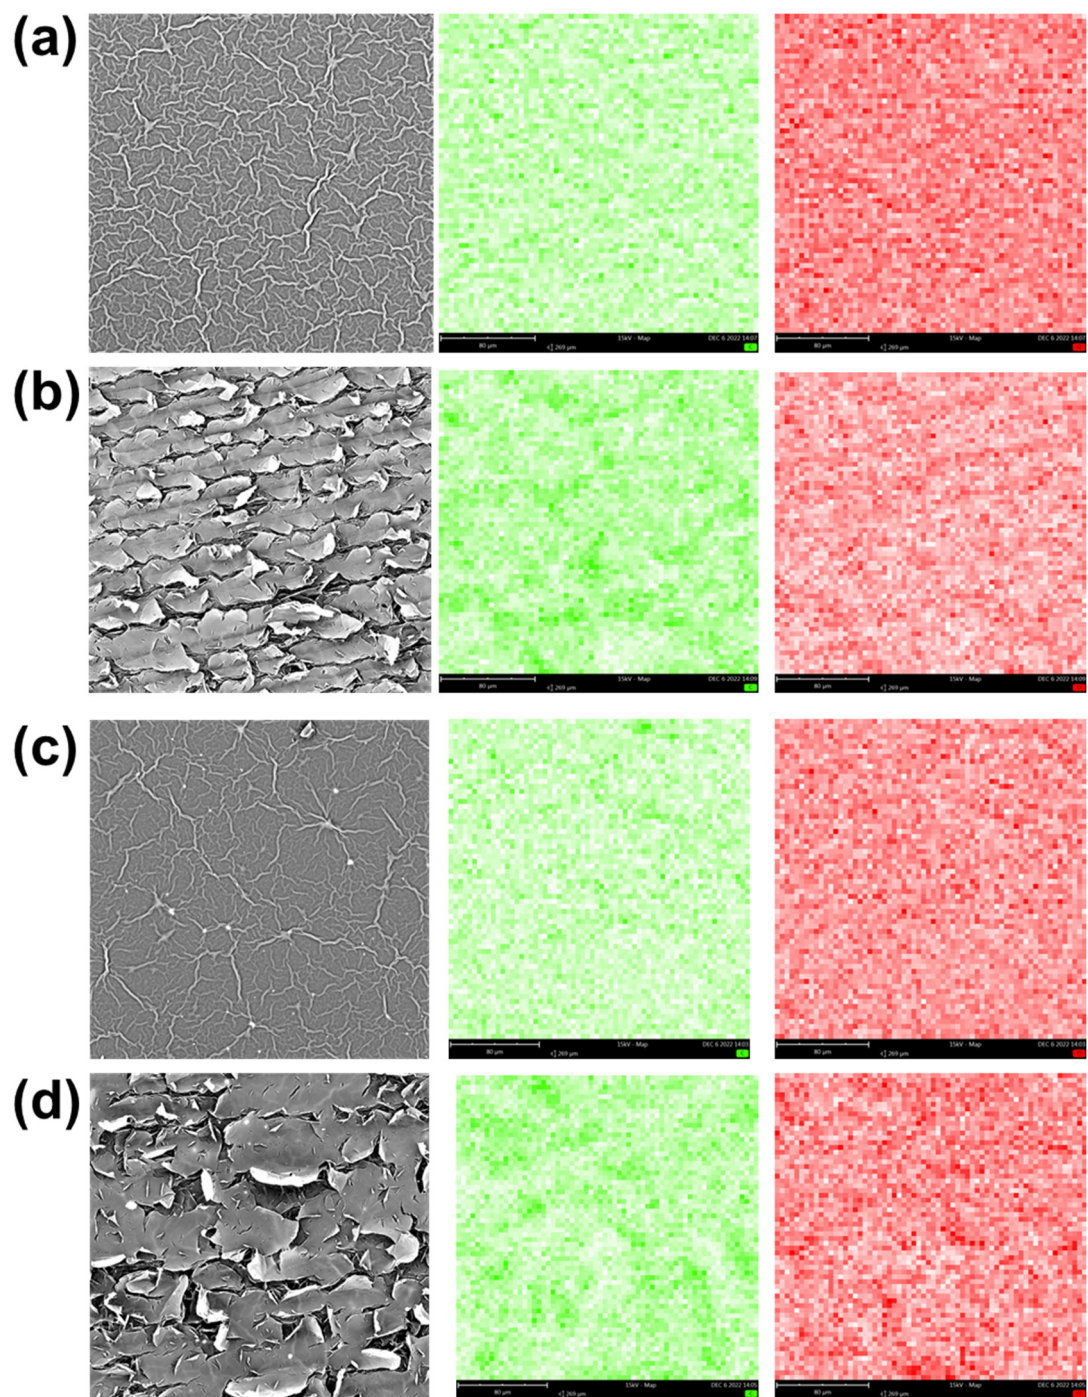

**Figure S3** SEM images and corresponding C and O EDX maps of (a) GO, (b) reduced GO, (c) GO/MWCNT composites, and (d) reduced GO/MWCNT composite.

# Supplemetry Information

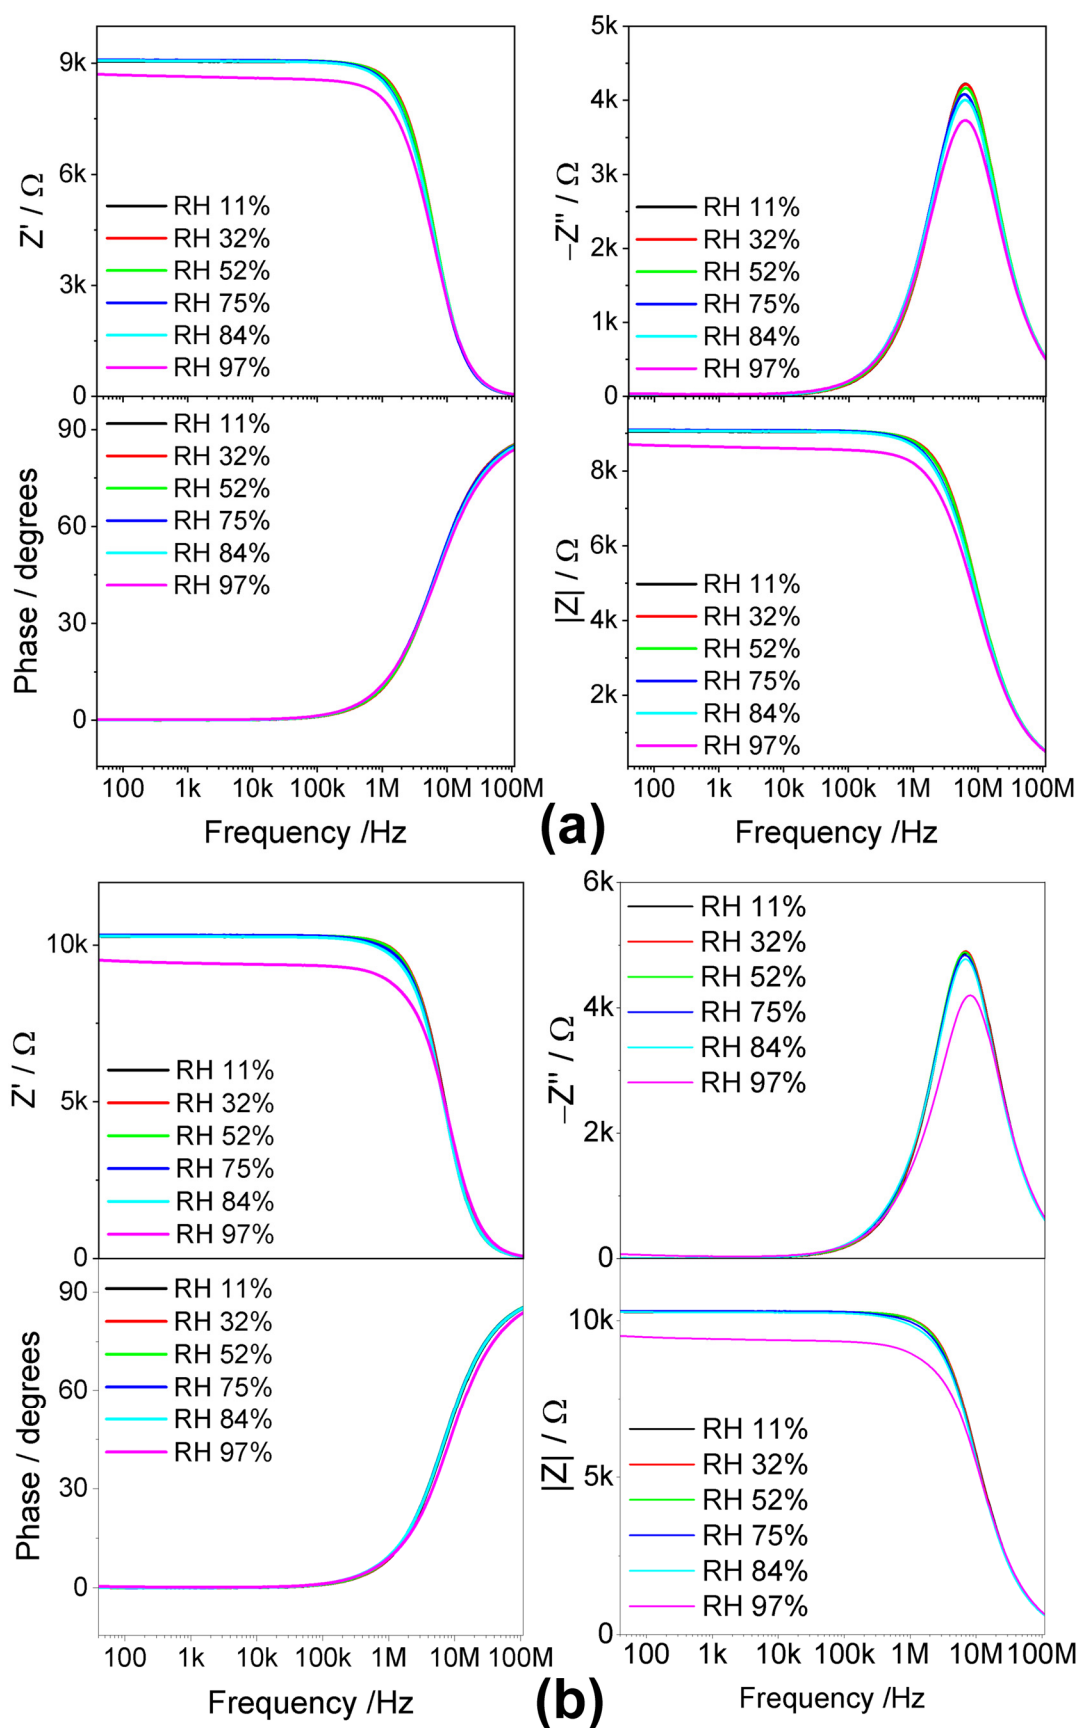

**Figure S4** Bode-Bode plot corresponding to Figure 9 in the manuscript; (a) rGO rectangular films, (b) rGO/MWNT.

# Supplementary Information

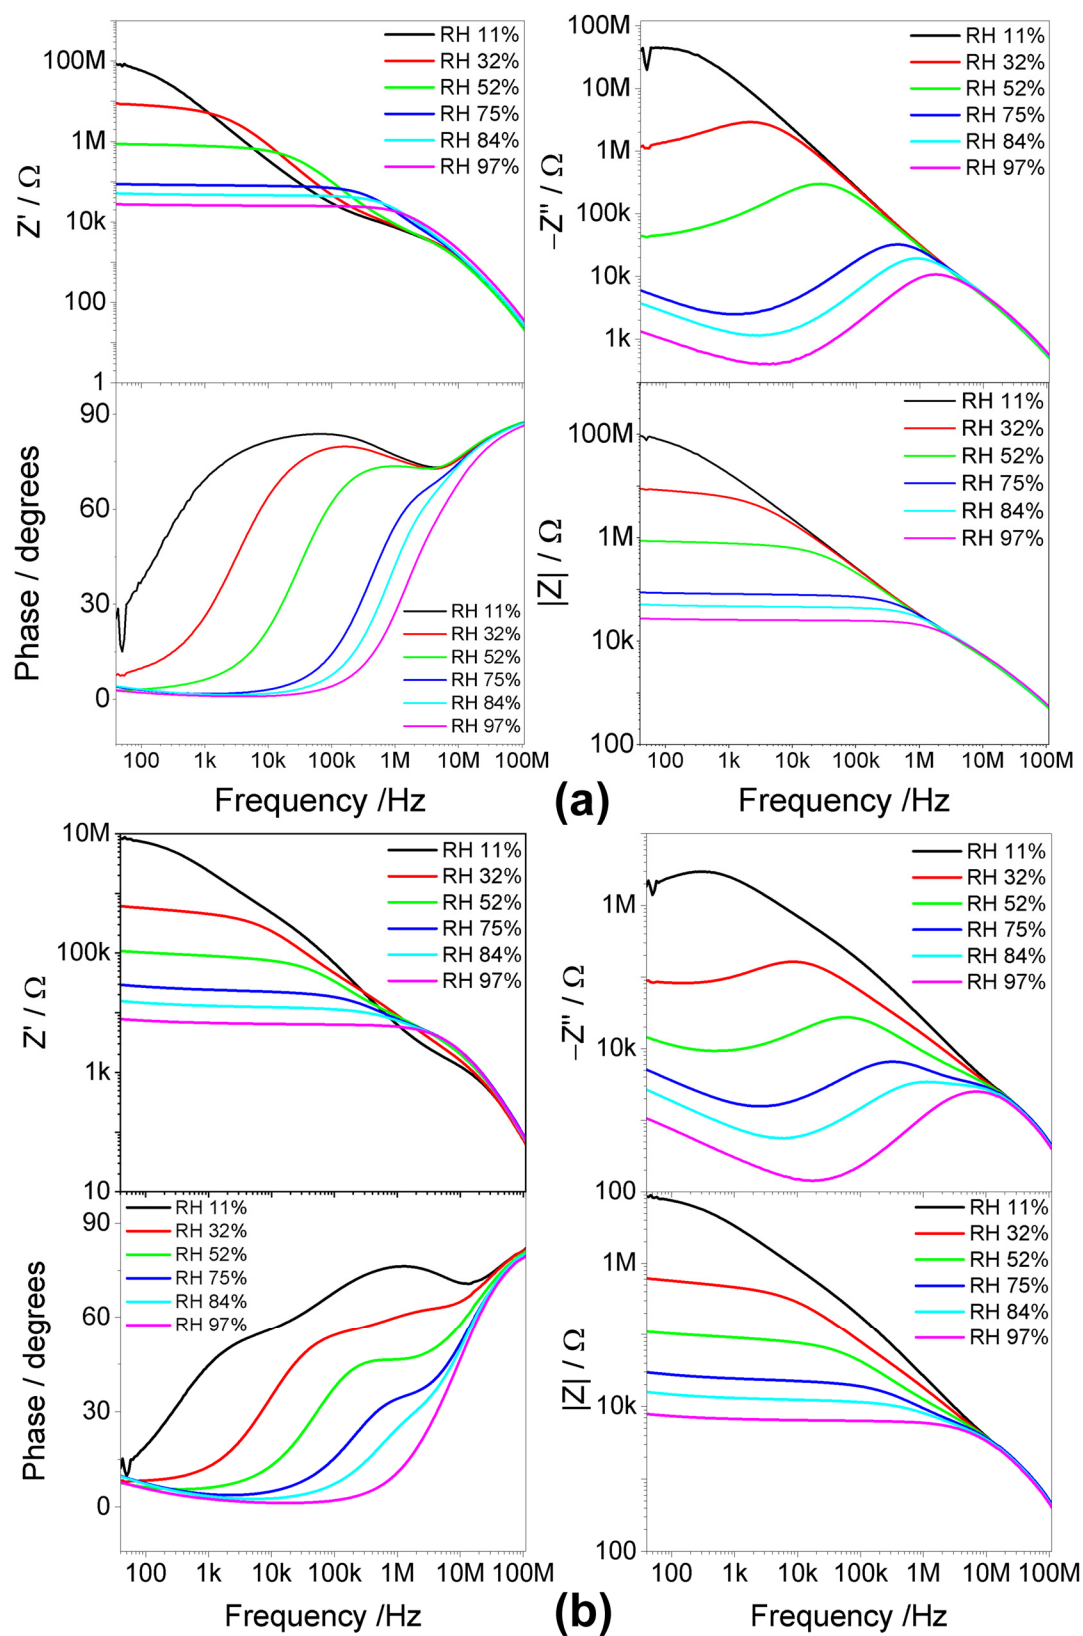

**Figure S5** Bode-Bode plot corresponding to Figure 9 in the manuscript; (a) rGO-GO-rGO IDE and (b) rGO/MWNT-GO/MWNT-rGO/MWNT IDE.

# Supplementary Information

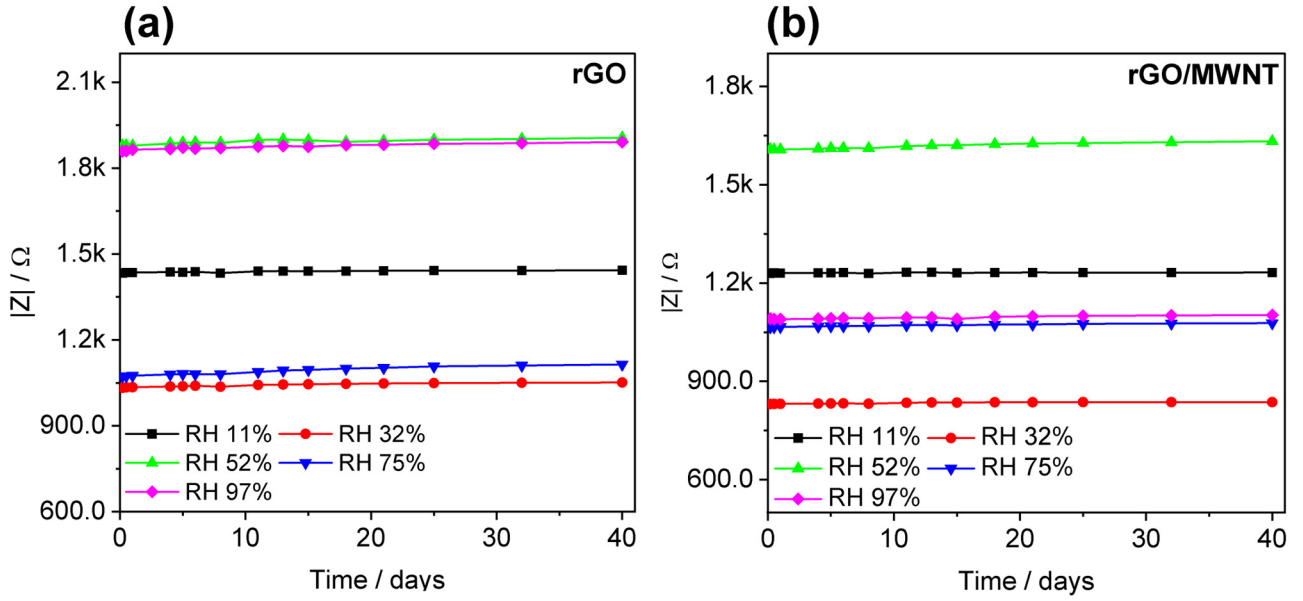

**Figure S6** Stability of the (a) rGO and (b) rGO/MWNT films inside different humidity points, sensors are from different production batch.

**Table S2** Equivalent circuit parameter values for rGO/MWNT IDE sensor at different humidities. The corresponding fittings are shown in Figure S6.

|                              | RH 11%       | RH 32%       | RH 52%       |                           | RH 75%      | RH 84%      | RH 97%      |
|------------------------------|--------------|--------------|--------------|---------------------------|-------------|-------------|-------------|
|                              |              |              |              |                           |             |             |             |
| $C_1$ (pF)                   | 4.42±0.57%   | 5.56±0.62%   | 3.14±1.81%   | $C_1$ (pF)                | 2.32±0.41%  | 2.42±0.29%  | 2.27±0.25%  |
| $R_1$ (kΩ)                   | 5830.1±0.37% | 6316.1±1.36% | 1282.9±0.32% | $R_1$ (kΩ)                | 100.1±0.38% | 34.77±0.36% | 5.77±8.78%  |
| $Q_1$ (nF s <sup>n-1</sup> ) | 1.38±1.94%   | 14.31±1.96%  | 9.25±1.36%   | $Q_1$ (nF) <sup>n-1</sup> | 4.36±2.81%  | 2.89±3.48%  | 0.54±1.11%  |
| $n_1$                        | 0.56±0.34%   | 0.42±0.43%   | 0.52±0.24%   | $n_1$                     | 0.62±0.34%  | 0.66±0.39%  | 0.76±0.83%  |
| $R_2$ (kΩ)                   | 3.82±1.41%   | 5.33±1.61%   | 2.77±3.07%   | $R_2$ (kΩ)                | 7.97±0.86%  | 7.73±0.63%  | 5.93±0.83%  |
| $Q_2$ (pF s <sup>n-1</sup> ) | 18.17±5.75%  | 23.09±6.55%  | 9.32±7.63%   | $Q_3$ (μF) <sup>n-1</sup> | 6.83±4.26%  | 12.9±2.25%  | 50.74±2.77% |
| $n_2$                        | 0.92±0.33%   | 0.9±0.38%    | 0.97±0.47%   | $n_3$                     | 0.38±1.01%  | 0.36±0.84%  | 0.34±1.49%  |



# Supplementary Information

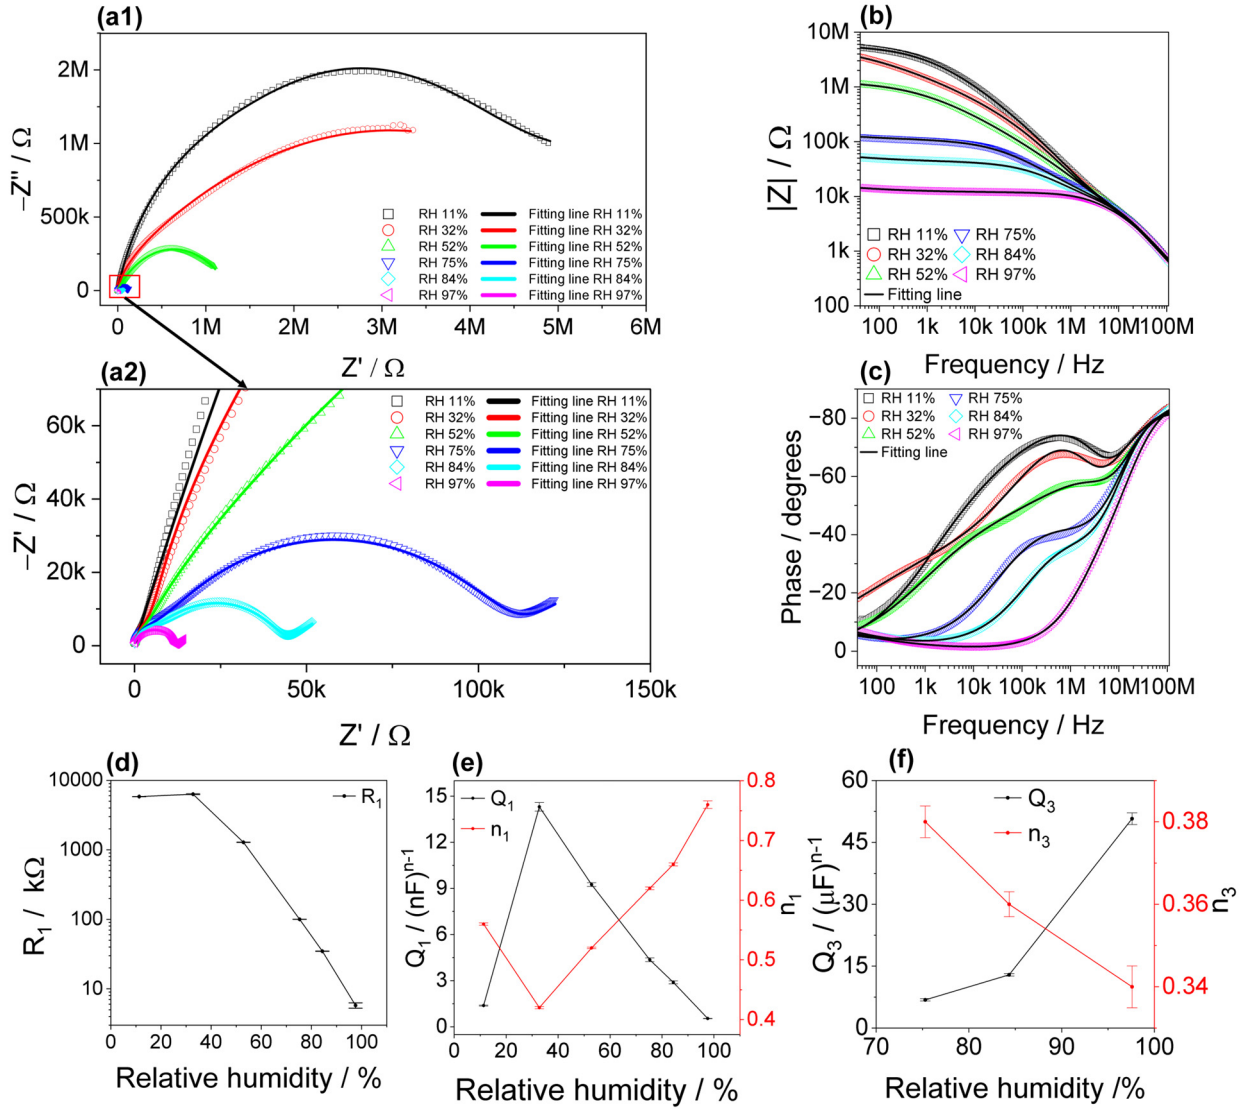

**Figure S7** Fitting of GO/MWNT IDE sensor: (a) Nyquist plot, Bode plot of (b) impedance and (c) phase. values of (d)  $R_1$ , (e)  $Q_1$ - $n_1$ , and (f)  $Q_3$ - $n_3$  parameters obtained from the equivalent circuits fitting versus RH%.
